# Supplementary material for: An Assessment of Potential Threats to Human Health from Algae Blooms in the Indian River Lagoon (USA) 2018–2021: Unique Patterns of Cytotoxicity Associated with Toxins
Source: Toxins (Basel). 2023 Nov 17;15(11):664. doi: 10.3390/toxins15110664 (PMC10675324; doi:10.3390/toxins15110664)
Supplement: Supplementary file 1 [file toxins-15-00664-s001.zip › Guzman TableS1.xlsx]

## Sheet: Cytotoxic_allYrsMethUpdtd
sort	Year	Season	Site	COLL_DATE	SiteDescription	Unique Site ID	VIAL_NO	ISOLN_ID	Method	Hep G2	Vero	SH-SY5Y	OATP1A2	OATP1B1	PP2A	RBC LYSIS	RBC AGG	HepG2_ERR	Vero_ERR	SHSY5Y_ERR	OATP1A2_ERR	OATP1B1_ERR	PP2A ERR	RBC_LysisERR	RBC_AggERR
Yr-1-1	1	Wet	1	2018-08-23	Site-01 South Fork 2	2018-08-23-CCHH-01-McFarland	40635	SANJ4-20-1	1	18	4	19	54	26	74	-5	-1	2.5	1.71919	1	1.5	0	1.77882	0.26748	3
Yr-1-1	1	Wet	1	2018-08-23	Site-01 South Fork 2	2018-08-23-CCHH-01-McFarland	40636	SANJ4-20-2	1	8	2	15	56	50	74	-4	-1	1.4288	2	4	2.5	3	2.07286	2.71571	4
Yr-1-1	1	Wet	1	2018-08-23	Site-01 South Fork 2	2018-08-23-CCHH-01-McFarland	40637	SANJ4-20-3	1	26	10	5	74	51	74	-2	-2	3	1.05285	1	1	2	0.8673	1.8346	1
Yr-1-2	1	Dry	1	2019-03-18	Site-01 South Fork 2	2019-03-18-CCHH-01-McFarland	40794	SANJ4-46-1-EtOAc	2	-1	2	4	5	0	0	-2	23	3	0.00882211	4	5	4	2.27344	2.50102	1
Yr-1-2	1	Dry	1	2019-03-18	Site-01 South Fork 2	2019-03-18-CCHH-01-McFarland	40795	SANJ4-46-2-EtOAc	2	-2	2	5	-4	6	0	-1	1	1	0.729294	0	6	5	2.07284	1.02964	0
Yr-1-2	1	Dry	1	2019-03-18	Site-01 South Fork 2	2019-03-18-CCHH-01-McFarland	40796	SANJ4-46-3-EtOAc	2	2	0	1	5	-3	1	105	67	1	1.28509	1	2	7	0.631129	1	2
Yr-2-1	2	Wet	1	2019-10-15	Site-01 South Fork 2	2019-10-15-CCHH-01-McFarland	41271	SanJ5-1-1E	4	0	60	52	62	53	20	63	16	2.66127	5.65685	1.41421	2.82843	0.712407	2.08758	1.2704	3
Yr-2-1	2	Wet	1	2019-10-15	Site-01 South Fork 2	2019-10-15-CCHH-01-McFarland	41272	SanJ5-1-2E	4	14	1	4	40	11	3	40	4	0.650082	0	3	1	2	0.29129	0.379053	1
Yr-2-1	2	Wet	1	2019-10-15	Site-01 South Fork 2	2019-10-15-CCHH-01-McFarland	41273	SanJ5-1-3E	4	11	68	56	56	65	12	72	-2	2.14121	2.12132	0.707107	0.707107	2.96741	1.65064	0	2
Yr-2-2	2	Dry	1	2020-05-20	Site-01 South Fork 2	2020-05-20-CCHH-01-Beckler	41295	RobJ12-23-1E	4	43	90	84	92	92	0	65	81	1	3.53553	0.707107	2.12132	1.57424	1.69919	0.549053	8
Yr-2-2	2	Dry	1	2020-05-20	Site-01 South Fork 2	2020-05-20-CCHH-01-Beckler	41296	RobJ12-23-2E	4	0	-1	37	36	28	0	-11	15	2.83598	2	3	0	2	1.99048	0.160811	1
Yr-2-2	2	Dry	1	2020-05-20	Site-01 South Fork 2	2020-05-20-CCHH-01-Beckler	41297	RobJ12-23-3E	4	2	43	54	30	37	0	61	5	0.150332	0	2.82843	2	2	0.436935	0	2
Yr-1-1	1	Wet	2	2018-08-23	Site-02 South Fork	2018-08-23-CCHH-02-McFarland	40638	RobJ11-57-1	1	2	-7	11	28	20	74	-5	1	1.54787	0.0711387	2	1	3	0.808492	0.242305	0
Yr-1-1	1	Wet	2	2018-08-23	Site-02 South Fork	2018-08-23-CCHH-02-McFarland	40639	RobJ11-57-2	1	4	0	9	29	21	73	-2	-3	2.29203	0.709016	2	1	9	0.397071	0.53496	2
Yr-1-1	1	Wet	2	2018-08-23	Site-02 South Fork	2018-08-23-CCHH-02-McFarland	40640	RobJ11-57-3	1	3	-2	7	68	60	73	-3	-1	1.04183	0.976971	4	1	2.5	0.432121	2.58669	2
Yr-1-2	1	Dry	2	2019-03-18	Site-02 South Fork	2019-03-18-CCHH-02-McFarland	40797	TANK5-58-1-EtOAc	2	9	12	3	-1	0	-1	8	-1	3	0.485216	3	5	6	1.45645	0.0876981	0
Yr-1-2	1	Dry	2	2019-03-18	Site-02 South Fork	2019-03-18-CCHH-02-McFarland	40798	TANK5-58-2-EtOAc	2	7	2	2	6	-1	0	-3	10	2	0.943966	5	4	1	0.87387	0.129923	1
Yr-1-2	1	Dry	2	2019-03-18	Site-02 South Fork	2019-03-18-CCHH-02-McFarland	40799	TANK5-58-3-EtOAc	2	-1	3	12	-1	0	0	3	13	3	1.20275	2	0	3	1.16516	1.86765	1
Yr-2-1	2	Wet	2	2019-10-15	Site-02 South Fork	2019-10-15-CCHH-02-McFarland	41274	SanJ5-2-1E	4	-1	0	28	8	4	0	11	1	0.792288	0	0	0	2	0.0970967	0.0712161	4
Yr-2-1	2	Wet	2	2019-10-15	Site-02 South Fork	2019-10-15-CCHH-02-McFarland	41275	SanJ5-2-2E	4	-2	-4	32	60	54	9	28	-8	0.459121	0	0	0.707107	1.39088	0.0970967	1.05216	2
Yr-2-1	2	Wet	2	2019-10-15	Site-02 South Fork	2019-10-15-CCHH-02-McFarland	41276	SanJ5-2-3E	4	4	-1	26	4	2	0	23	-2	0.0812603	0	2	2	1	2.52451	0.107973	1
Yr-2-2	2	Dry	2	2020-05-20	Site-02 South Fork	2020-05-20-CCHH-02-Beckler	41298	RobJ12-23-4E	4	-2	1	38	23	15	0	59	1	2.37686	0	2	1	1	0.0970967	1.33013	1
Yr-2-2	2	Dry	2	2020-05-20	Site-02 South Fork	2020-05-20-CCHH-02-Beckler	41299	RobJ12-23-5E	4	0	-1	38	13	9	-1	23	0	1.58458	1	3	3	3	0.728225	0.294054	0
Yr-2-2	2	Dry	2	2020-05-20	Site-02 South Fork	2020-05-20-CCHH-02-Beckler	41300	RobJ12-23-6E	4	0	20	46	27	40	0	88	8	0.178773	1	4.24264	3	1	3.64113	0.252702	1
Yr-1-1	1	Wet	3	2018-08-23	Site-03 North Fork	2018-08-23-CCHH-03-McFarland	40641	TANK5-25-1	1	2	-2	5	54	22	72	-3	-2	2.79807	0.317753	3	1	1.5	1.88491	2.39473	2
Yr-1-1	1	Wet	3	2018-08-23	Site-03 North Fork	2018-08-23-CCHH-03-McFarland	40642	TANK5-25-2	1	3	-1	4	55	34	70	-3	1	5.20916	0.187332	3	2.5	1	3.56094	3.46465	2
Yr-1-1	1	Wet	3	2018-08-23	Site-03 North Fork	2018-08-23-CCHH-03-McFarland	40643	TANK5-25-3	1	3	-2	5	56	23	72	-3	0	0.863233	1.59825	1	1	5.5	0.808727	3.96185	1
Yr-1-2	1	Dry	3	2019-03-18	Site-03 North Fork	2019-03-18-CCHH-03-McFarland	40800	RobJ11-76-1-EtOAc	2	1	1	7	3	31	1	5	-1	0	1.70267	5	1	1	0.339838	0.272839	1
Yr-1-2	1	Dry	3	2019-03-18	Site-03 North Fork	2019-03-18-CCHH-03-McFarland	40801	RobJ11-76-2-EtOAc	2	4	0	3	1	-3	0	-1	2	0	1.39095	1	5	6	1.16516	0.246854	1
Yr-1-2	1	Dry	3	2019-03-18	Site-03 North Fork	2019-03-18-CCHH-03-McFarland	40802	RobJ11-76-3-EtOAc	2	66	73	54	5	5	15	0	-4	2	1	3	8	6	0.388387	0	0
Yr-2-1	2	Wet	3	2019-10-15	Site-03 North Fork	2019-10-15-CCHH-03-McFarland	41277	RobJ12-7-1E	4	1	30	46	62	62	48	82	1	0.901989	0	0.707107	0.707107	2.11175	2	0.999322	5
Yr-2-1	2	Wet	3	2019-10-15	Site-03 North Fork	2019-10-15-CCHH-03-McFarland	41278	RobJ12-7-2E	4	-2	40	46	37	45	6	64	0	0.861359	1	0.707107	1	0.162558	2.28177	1.53919	2
Yr-2-1	2	Wet	3	2019-10-15	Site-03 North Fork	2019-10-15-CCHH-03-McFarland	41279	RobJ12-7-3E	4	1	-2	22	20	19	0	65	10	0.276285	2	1	1	1	0.0485484	1.0154	2
Yr-2-2	2	Dry	3	2020-05-20	Site-03 North Fork	2020-05-20-CCHH-03-Beckler	41301	SanJ5-19-1E	4	14	56	43	80	82	8	87	25	0.491625	2.12132	4.24264	0	0.247357	1.35935	0.202162	6
Yr-2-2	2	Dry	3	2020-05-20	Site-03 North Fork	2020-05-20-CCHH-03-Beckler	41302	SanJ5-19-2E	4	9	55	48	78	82	16	88	15	0.105638	2.82843	2.12132	0.707107	0.508082	0.145645	0.705269	0
Yr-2-2	2	Dry	3	2020-05-20	Site-03 North Fork	2020-05-20-CCHH-03-Beckler	41303	SanJ5-19-3E	4	0	-2	26	1	6	2	3	12	1.64146	1	3	3	1	1.4079	0.498513	2
Yr-1-1	1	Wet	4	2018-08-23	Site-04 Middle Estuary	2018-08-23-CCHH-04-McFarland	40644	WRI29-35-1	1	3	-3	4	49	38	72	-4	-2	3.06596	0.53354	8	2.5	1.5	0.83225	0.506638	3
Yr-1-1	1	Wet	4	2018-08-23	Site-04 Middle Estuary	2018-08-23-CCHH-04-McFarland	40645	WRI29-35-2	1	3	-1	6	44	5	73	-3	-1	2.5897	0.867892	1	3	1.5	0.296863	2.84473	2
Yr-1-1	1	Wet	4	2018-08-23	Site-04 Middle Estuary	2018-08-23-CCHH-04-McFarland	40646	WRI29-35-4	1	4	0	4	8	42	73	-3	-2	0.238133	3.40043	1	3	1	1.17475	2.58039	1
Yr-1-2	1	Dry	4	2019-03-18	Site-04 Middle Estuary	2019-03-18-CCHH-04-McFarland	40803	SANJ4-47-1-EtOAc	2	8	3	5	7	7	0	0	-2	2	0.54403	5	5	7	2.13613	0.941943	0
Yr-1-2	1	Dry	4	2019-03-18	Site-04 Middle Estuary	2019-03-18-CCHH-04-McFarland	40804	RobJ11-76-4-EtOAc	2	76	91	14	2	6	11	-1	-2	1	1.5821	2	1	5	0.29129	0.00649616	1
Yr-1-2	1	Dry	4	2019-03-18	Site-04 Middle Estuary	2019-03-18-CCHH-04-McFarland	40805	RobJ11-76-5-EtOAc	2	63	58	19	-1	-1	14	0	-2	2	1	6	9	1	1.55355	0.893222	0
Yr-2-1	2	Wet	4	2019-10-15	Site-04 Middle Estuary	2019-10-15-CCHH-04-McFarland	41280	RobJ12-7-4E	4	0	0	6	56	65	16	89	9	0.357545	2	0	3.53553	2.93814	1.69919	0.248108	0
Yr-2-1	2	Wet	4	2019-10-15	Site-04 Middle Estuary	2019-10-15-CCHH-04-McFarland	41281	RobJ12-7-5E	4	-1	-3	6	27	24	0	-3	13	0.910115	0	2	0	0	2.76726	0.997025	0
Yr-2-1	2	Wet	4	2019-10-15	Site-04 Middle Estuary	2019-10-15-CCHH-04-McFarland	41282	RobJ12-7-6E	4	1	1	7	96	93	20	88	24	2.21028	0	0	1.41421	1.42877	1.69919	0.160811	3
Yr-2-2	2	Dry	4	2020-05-20	Site-04 Middle Estuary	2020-05-20-CCHH-04-Beckler	41304	SanJ5-20-1E	4	-1	30	48	51	53	12	91	9	2.83598	1	2.82843	0	1.00833	2.57306	0.197567	1
Yr-2-2	2	Dry	4	2020-05-20	Site-04 Middle Estuary	2020-05-20-CCHH-04-Beckler	41305	SanJ5-20-2E	4	3	26	42	62	63	17	88	-3	2.36061	1	0	0.707107	1.07636	1.35935	0.769593	2
Yr-2-2	2	Dry	4	2020-05-20	Site-04 Middle Estuary	2020-05-20-CCHH-04-Beckler	41306	SanJ5-20-3E	4	13	9	42	43	41	12	80	11	1.41799	0	0.707107	0	2	1.84484	0.232027	3
Yr-3-1	3	Wet	4	2020-09-30	Site-04 Middle Estuary	2020-09-30-CCHH-04-McFarland	41431	SanJ5-45-1E	3	0	8	2	4	20	6	8	2	2	1	0	1	7	1	0	3
Yr-3-1	3	Wet	4	2020-09-30	Site-04 Middle Estuary	2020-09-30-CCHH-04-McFarland	41432	SanJ5-45-2E	3	0	28	3	27	30	2	33	23	1	1	1	3	3	3	1.81946	0
Yr-3-1	3	Wet	4	2020-09-30	Site-04 Middle Estuary	2020-09-30-CCHH-04-McFarland	41433	SanJ5-45-3E	3	-1	13	0	13	22	-1	31	-3	0	0	1	0	1	2	0.569729	0
Yr-3-2	3	Dry	4	2021-04-23	Site-04 Middle Estuary	2021-04-23-CCHH-04-McFarland	41935	SANJ5-82-1E	3	54	3	22	6	2	4	-1	-2	0.643968	0.262586	1.95581	1.95648	0.534565	0.44293	0.559322	2.0466
Yr-3-2	3	Dry	4	2021-04-23	Site-04 Middle Estuary	2021-04-23-CCHH-04-McFarland	41936	SANJ5-82-2E	3	47	13	18	1	1	3	0	1	0.188721	2.06895	0.559691	2.577	1.17749	0	1.55995	0.206033
Yr-3-2	3	Dry	4	2021-04-23	Site-04 Middle Estuary	2021-04-23-CCHH-04-McFarland	41937	SANJ5-82-3E	3	30	0	11	29	21	2	46	0	1.00857	0.0663679	0.0684066	1.94918	0.260059	2.78413	2.71377	1.12632
Yr-1-1	1	Wet	5	2018-09-05	Site-05 Stuart Inlet	2018-09-05-CCHH-05-McFarland	40648	RobJ11-59-1-EtOAC	1	0	0	0	7	2	-1	-4	48	1.0716	4.73072	5	1	9	4.91426	1.02901	2
Yr-1-1	1	Wet	5	2018-09-05	Site-05 Stuart Inlet	2018-09-05-CCHH-05-McFarland	40650	RobJ11-59-2-EtOAC	1	5	-1	5	3	-3	0	0	100	2.97667	0.187332	1	4	5	4.09521	1.95732	2
Yr-1-1	1	Wet	5	2018-09-05	Site-05 Stuart Inlet	2018-09-05-CCHH-05-McFarland	40652	RobJ11-59-3-EtOAC	1	4	-2	7	-2	8	56	0	46	3.18503	1.4702	1	1	6	0.745685	0.918872	1.5
Yr-1-2	1	Dry	5	2019-03-20	Site-05 Stuart Inlet	2019-03-20-CCHH-05-McFarland	40806	TANK5-59-4-EtOAc	2	6	0	3	0	3	0	0	11	3	1.97027	1	2	5	0.679677	0.354041	1
Yr-1-2	1	Dry	5	2019-03-20	Site-05 Stuart Inlet	2019-03-20-CCHH-05-McFarland	40807	SANJ4-48-1-EtOAc	2	0	1	9	-2	6	0	0	11	4	0.714591	3	1	2	0.679677	0.708081	3
Yr-1-2	1	Dry	5	2019-03-20	Site-05 Stuart Inlet	2019-03-20-CCHH-05-McFarland	40808	RobJ11-77-4-EtOAc	2	17	12	4	6	6	1	-4	5	3	0.197027	2	1	5	0.825322	1.37069	6
Yr-3-1	3	Wet	5	2020-09-30	Site-05 Stuart Inlet	2020-09-30-CCHH-05-McFarland	41434	SanJ5-46-1E	3	9	1	28	33	22	1	24	-2	1	2	0	2	2	1	0.209054	0
Yr-3-1	3	Wet	5	2020-09-30	Site-05 Stuart Inlet	2020-09-30-CCHH-05-McFarland	41435	SanJ5-46-2E	3	0	7	24	50	30	-2	88	94	1	1	4	1.41421	2	2	1.03838	2
Yr-3-1	3	Wet	5	2020-09-30	Site-05 Stuart Inlet	2020-09-30-CCHH-05-McFarland	41436	SanJ5-46-3E	3	1	8	12	23	19	2	20	130	2	1	3	2	1	1	0.477837	2
Yr-3-2	3	Dry	5	2021-04-23	Site-05 Stuart Inlet	2021-04-23-CCHH-05-McFarland	41938	SANJ5-83-1E	3	0	6	0	10	4	2	4	-4	0.660158	0.56557	0.251861	0.598624	1.30752	2.97396	5.9165	3.33774
Yr-3-2	3	Dry	5	2021-04-23	Site-05 Stuart Inlet	2021-04-23-CCHH-05-McFarland	41939	SANJ5-83-2E	3	0	-1	1	6	23	2	13	-2	2.03549	0.554028	0.702723	2.4164	1.83486	1.51862	2.36557	0.549423
Yr-3-2	3	Dry	5	2021-04-23	Site-05 Stuart Inlet	2021-04-23-CCHH-05-McFarland	41940	SANJ5-83-3E	3	0	0	3	3	1	3	-1	-5	0.953561	1.24079	1.10383	2.83252	0.476774	0.759309	1.41113	0.769192
Yr-1-1	1	Wet	6	2018-09-05	Site-06 Jensen	2018-09-05-CCHH-06-McFarland	40654	WRI29-37-1-EtOAC	1	4	-1	6	6	5	0	-3	1	3.15526	0.80861	4	5	7	1.77459	0.60419	1
Yr-1-1	1	Wet	6	2018-09-05	Site-06 Jensen	2018-09-05-CCHH-06-McFarland	40656	WRI29-37-2-EtOAC	1	6	-3	9	2	-2	30	-4	-2	0.952533	0.924803	0	1	4	0	2.25313	5
Yr-1-1	1	Wet	6	2018-09-05	Site-06 Jensen	2018-09-05-CCHH-06-McFarland	40658	WRI29-37-3-EtOAC	1	23	62	20	72	52		50	104	3.4823	2.5283	3	1.5	2.5		4.20303	2
Yr-1-2	1	Dry	6	2019-03-20	Site-06 Jensen	2019-03-20-CCHH-06-McFarland	40809	RobJ11-77-1-EtOAc	2	69	95	55	100	100	29	3	-1	0	1	2	0	0	1.74774	1.93586	0
Yr-1-2	1	Dry	6	2019-03-20	Site-06 Jensen	2019-03-20-CCHH-06-McFarland	40810	RobJ11-77-2-EtOAc	2	47	17	34	-3	24	7	0	5	2	1.5027	3	3	2	1.505	1.17905	5
Yr-1-2	1	Dry	6	2019-03-20	Site-06 Jensen	2019-03-20-CCHH-06-McFarland	40811	RobJ11-77-3-EtOAc	2	64	56	34	1	37	15	-6	11	2	3	1	3	12	0.485484	0.782787	0
Yr-2-1	2	Wet	6	2019-10-01	Site-06 Jensen	2019-10-01-CCHH-06-Lapointe	41112	RobJ11-98-1aE	3	9	18	-6	11	14	4	-5	5	3	1	3	4	2	1.9111	1	0
Yr-2-1	2	Wet	6	2019-10-01	Site-06 Jensen	2019-10-01-CCHH-06-Lapointe	41113	RobJ11-98-1bE	3	39	-1	12	53	25	8	90	3	1	1	1	2.82843	2	1.16031	0.707107	1
Yr-2-1	2	Wet	6	2019-10-01	Site-06 Jensen	2019-10-01-CCHH-06-Lapointe	41114	RobJ11-98-2E	3	3	-1	-5	44	32	9	0	1	1	0	6	0.707107	0	0.546028	0	1
Yr-2-1	2	Wet	6	2019-10-01	Site-06 Jensen	2019-10-01-CCHH-06-Lapointe	41115	RobJ11-98-3E	3	1	-2	-5	11	11	-1	1	4	5	0	3	4	2	0.750789	1	1
Yr-2-1	2	Wet	6	2019-10-01	Site-06 Jensen	2019-10-01-CCHH-06-Lapointe	41116	RobJ11-98-4E	3	4	1	-6	27	10	-1	1	2	1	1	3	0	2	3.20792	0	3
Yr-2-2	2	Dry	6	2020-03-17	Site-06 Jensen	2020-03-17-CCHH-06-Lapointe	41307	SanJ5-17-1E	4	-2	-2	39	34	23	0	24	14	0.235655	1	1	0	2	1.94193	0.523783	7
Yr-2-2	2	Dry	6	2020-03-17	Site-06 Jensen	2020-03-17-CCHH-06-Lapointe	41308	SanJ5-17-2E	4	-2	-1	29	33	20	-1	-6	1	0.0650082	0	1	3	2	2.08758	0.470945	1
Yr-2-2	2	Dry	6	2020-03-17	Site-06 Jensen	2020-03-17-CCHH-06-Lapointe	41309	SanJ5-17-3E	4	-3	-2	33	-1	15	0	46	12	1.20672	0	1	1	1	1.31081	0.0872971	0
Yr-1-1	1	Wet	7	2018-09-05	Site-07 Fort Pierce Inlet	2018-09-05-CCHH-07-McFarland	40660	TANK5-27-1-EtOAC	1	1	-2	2	5	-5	16	0	103	1.45857	1.06945	1	1	1	0.87387	2.9234	1
Yr-1-1	1	Wet	7	2018-09-05	Site-07 Fort Pierce Inlet	2018-09-05-CCHH-07-McFarland	40662	TANK5-27-2-EtOAC	1	3	-3	12	-5	3	0	-2	87	1.27997	0.962744	3	2	1	0.750789	0.245452	1
Yr-1-1	1	Wet	7	2018-09-05	Site-07 Fort Pierce Inlet	2018-09-05-CCHH-07-McFarland	40664	TANK5-27-3-EtOAC	1	3	-2	8	-3	2	-1	-5	35	1.90507	0.0592822	6	3	2	4.70949	0.53496	1
Yr-1-2	1	Dry	7	2019-03-20	Site-07 Fort Pierce Inlet	2019-03-20-CCHH-07-McFarland	40812	SANJ4-49-1-EtOAc	2	26	-1	58	20	44	7	0	9	0	0.485216	1	1	2	0.29129	0.32156	2
Yr-1-2	1	Dry	7	2019-03-20	Site-07 Fort Pierce Inlet	2019-03-20-CCHH-07-McFarland	40813	SANJ4-49-2-EtOAc	2	13	2	62	22	30	7	-2	12	1	1.17334	1	2	7	1.6021	2.46529	2
Yr-1-2	1	Dry	7	2019-03-20	Site-07 Fort Pierce Inlet	2019-03-20-CCHH-07-McFarland	40814	SANJ4-49-3-EtOAc	2	12	-1	21	22	27	8	-2	3	2	0.893974	3	3	1	1.11661	1.86115	0
Yr-3-1	3	Wet	7	2020-09-30	Site-07 Fort Pierce Inlet	2020-09-30-CCHH-07-McFarland	41437	RobJ12-39-1E	3	13	10	16	58	61	1	88	121	1	1	0	2.12132	0.453184	2	0.0229729	3
Yr-3-1	3	Wet	7	2020-09-30	Site-07 Fort Pierce Inlet	2020-09-30-CCHH-07-McFarland	41438	RobJ12-39-2E	3	10	4	5	8	10	4	30	-4	1	0	1	0	2	0	1.10959	1
Yr-3-1	3	Wet	7	2020-09-30	Site-07 Fort Pierce Inlet	2020-09-30-CCHH-07-McFarland	41439	RobJ12-39-3E	3	1	44	15	35	47	1	16	61	1	1	0	1	0.626263	0	0.362972	5
Yr-3-2	3	Dry	7	2021-04-23	Site-07 Fort Pierce Inlet	2021-04-23-CCHH-07-McFarland	41941	SANJ5-84-1E	3	4	0	1	2	6	1	0	-2	1.13694	1.37353	0.326486	3.10263	1.2425	0.822585	0.974966	0.219769
Yr-3-2	3	Dry	7	2021-04-23	Site-07 Fort Pierce Inlet	2021-04-23-CCHH-07-McFarland	41942	SANJ5-84-2E	3	3	7	6	10	-1	2	0	-5	1.50828	0.61751	2.71761	1.32865	0.180596	1.96155	0.277096	0.49448
Yr-3-2	3	Dry	7	2021-04-23	Site-07 Fort Pierce Inlet	2021-04-23-CCHH-07-McFarland	41943	SANJ5-84-3E	3	5	1	0	15	2	0	-1	0	1.059	1.62169	1.66974	1.51116	0.0722385	2.46776	0.800498	0.920283
Yr-1-1	1	Wet	8	2018-09-05	Site-08 Harbor Branch Link Port Canal	2018-09-05-CCHH-08-McFarland	40666	RobJ11-59-4-EtOAC	1	6	-3	14	-3	-7	44	2	84	1.19067	0.130421	3	2	0	4.49457	1.136	2
Yr-1-1	1	Wet	8	2018-09-05	Site-08 Harbor Branch Link Port Canal	2018-09-05-CCHH-08-McFarland	40668	RobJ11-59-5-EtOAC	1	5	-2	4	0	0	38	-2	35	0.7144	0.106708	0	3	5	7.96589	2.80067	0
Yr-1-1	1	Wet	8	2018-09-05	Site-08 Harbor Branch Link Port Canal	2018-09-05-CCHH-08-McFarland	40670	RobJ11-59-6-EtOAC	1	8	-2	14	-1	-5	0	1	34	3	0.592822	3	2	2	1.29682	1.11083	2
Yr-1-2	1	Dry	8	2019-03-20	Site-08 Harbor Branch Link Port Canal	2019-03-20-CCHH-08-McFarland	40815	TANK5-59-1-EtOAc	2	7	1	18	2	6	8	2	1	2	0.141154	2	1	5	2.28177	0.347544	1
Yr-1-2	1	Dry	8	2019-03-20	Site-08 Harbor Branch Link Port Canal	2019-03-20-CCHH-08-McFarland	40816	TANK5-59-2-EtOAc	2	0	4	48	1	4	7	-2	1	1	0.297011	1	1	2	2.23322	0.799027	0
Yr-1-2	1	Dry	8	2019-03-20	Site-08 Harbor Branch Link Port Canal	2019-03-20-CCHH-08-McFarland	40817	TANK5-59-3-EtOAc	2	0	2	21	4	-3	9	-1	1	1	0.679302	1	2	6	1.31081	2.57897	2
Yr-3-2	3	Dry	8	2021-06-21	Site-08 Harbor Branch Link Port Canal	2021-06-21-CCHH-08-Lapointe	41944	SANJ5-89-1E	3	49	8	1	43	0	0	8	-1	0.315407	1.77751	1.14426	0.503834	0.353969	1.96155	3.27896	2.11528
Yr-3-2	3	Dry	8	2021-06-21	Site-08 Harbor Branch Link Port Canal	2021-06-21-CCHH-08-Lapointe	41945	SANJ5-89-2E	3	45	2	1	58	51	3	99	15	0.862759	0.438605	1.90917	0.536867	0.636591	2.3412	0.504169	1.35982
Yr-3-2	3	Dry	8	2021-06-21	Site-08 Harbor Branch Link Port Canal	2021-06-21-CCHH-08-Lapointe	41946	SANJ5-89-3E	3	59	1	1	54	9	1	12	11	0.422504	0.268357	1.20955	0.339941	2.55002	3.29034	2.40149	1.51091
Yr-1-1	1	Wet	9	2018-09-20	Site-09 Vero Beach LOBO	2018-09-20-CCHH-09-McFarland	40672	SANJ4-26-1-EtOAC	1	3	-3	17	3	1	-1	-6	-2	2.679	0.652105	3	2	2	2.18411	0.61363	0
Yr-1-1	1	Wet	9	2018-09-20	Site-09 Vero Beach LOBO	2018-09-20-CCHH-09-McFarland	40674	SANJ4-26-2-EtOAC	1	5	0	6	16	7	0	-4	43	0.684633	1.40855	2	6	2	0.273014	0.27692	1.5
Yr-1-1	1	Wet	9	2018-09-20	Site-09 Vero Beach LOBO	2018-09-20-CCHH-09-McFarland	40676	SANJ4-26-3-EtOAC	1	5	-1	13	-3	-2	-1	-4	60	3.24456	0.329609	2	1	5	0.341268	0.481464	1
Yr-1-2	1	Dry	9	2019-03-22	Site-09 Vero Beach LOBO	2019-03-22-CCHH-09-McFarland	40818	TANK5-60-1-EtOAc	2	3	0	14	1	27	2	-2	0	1	1.31744	1	0	2	1.55355	0.250102	2
Yr-1-2	1	Dry	9	2019-03-22	Site-09 Vero Beach LOBO	2019-03-22-CCHH-09-McFarland	40819	TANK5-60-2-EtOAc	2	1	-1	9	6	30	2	-3	6	3	0.332299	2	3	0	1.01952	0.961431	7
Yr-1-2	1	Dry	9	2019-03-22	Site-09 Vero Beach LOBO	2019-03-22-CCHH-09-McFarland	40820	TANK5-60-3-EtOAc	2	0	1	1	2	24	2	-1	4	0	1.65856	2	7	2	1.16516	0.0324808	6
Yr-3-1	3	Wet	9	2020-09-30	Site-09 Vero Beach LOBO	2020-09-30-CCHH-09-McFarland	41440	RobJ12-39-4E	3	-1	28	11	50	51	3	16	3	3	1	2	1.41421	0.355096	3	1.22446	0
Yr-3-1	3	Wet	9	2020-09-30	Site-09 Vero Beach LOBO	2020-09-30-CCHH-09-McFarland	41441	RobJ12-39-5E	3	34	31	10	71	73	4	23	84	1	1	1	1.41421	2.80818	1	0.107973	5
Yr-3-1	3	Wet	9	2020-09-30	Site-09 Vero Beach LOBO	2020-09-30-CCHH-09-McFarland	41442	RobJ12-39-6E	3	0	13	3	24	26	4	19	-6	0	0	1	3	0	3	0.808647	0
Yr-3-2	3	Dry	9	2021-04-23	Site-09 Vero Beach LOBO	2021-04-23-CCHH-09-McFarland	41947	RobJ12-56-1E	3	0	0	5	66	70	21	83	23	0.912301	0.271243	0.528597	0.543527	2.27743	0.885861	0.241664	0.439538
Yr-3-2	3	Dry	9	2021-04-23	Site-09 Vero Beach LOBO	2021-04-23-CCHH-09-McFarland	41948	RobJ12-56-2E	3	0	1	3	12	39	20	1	0	0.692249	1.08786	4.54842	4.65029	0.0722385	1.51862	1.47271	0.645571
Yr-3-2	3	Dry	9	2021-04-23	Site-09 Vero Beach LOBO	2021-04-23-CCHH-09-McFarland	41949	RobJ12-56-3E	3	0	3	1	65	56	18	47	-1	1.97589	1.50049	0.693394	1.6618	0.0296301	1.70845	0.904525	1.30488
Yr-1-1	1	Wet	10	2018-09-20	Site-10 Vero Beach (Barber Bridge)	2018-09-20-CCHH-10-McFarland	40678	WRI29-40-1-EtOAC	1	3	-2	12	-2	-1	-1	0	17	2.17297	0.841808	0	2	5	4.02696	0.13846	1
Yr-1-1	1	Wet	10	2018-09-20	Site-10 Vero Beach (Barber Bridge)	2018-09-20-CCHH-10-McFarland	40680	TANK5-36-1-EtOAC	1	4	-2	6	-1	-1	1	-1	0	2.53017	2.00374	0	1	1	3.81136	1.40663	1
Yr-1-1	1	Wet	10	2018-09-20	Site-10 Vero Beach (Barber Bridge)	2018-09-20-CCHH-10-McFarland	40682	TANK5-36-2-EtOAC	1	9	-1	2	2	3	1	1	64	1.19067	2.41634	3	4	0	4.61375	1.00384	1.5
Yr-1-2	1	Dry	10	2019-03-22	Site-10 Vero Beach (Barber Bridge)	2019-03-22-CCHH-10-McFarland	40821	RobJ11-78-1-EtOAc	2	1	2	0	2	2	10	-10	4	1	0.111747	0	1	4	1.79629	1.61754	4
Yr-1-2	1	Dry	10	2019-03-22	Site-10 Vero Beach (Barber Bridge)	2019-03-22-CCHH-10-McFarland	40822	RobJ11-78-2-EtOAc	2	37	26	9	-4	2	8	-9	0	1	0	1	0	2	1.74774	1.41291	0
Yr-1-2	1	Dry	10	2019-03-22	Site-10 Vero Beach (Barber Bridge)	2019-03-22-CCHH-10-McFarland	40823	RobJ11-78-3-EtOAc	2	71	98	4	78	74	3	-2	-3	3	2	0	2	1	0.970967	0.386521	1
Yr-2-1	2	Wet	10	2019-10-03	Site-10 Vero Beach (Barber Bridge)	2019-10-03-CCHH-10-Lapointe	41117	SANJ4-97-1E	3	12	1	-5	14	0	70	-3	6	2	1	8	2	2	2	0	0
Yr-2-1	2	Wet	10	2019-10-03	Site-10 Vero Beach (Barber Bridge)	2019-10-03-CCHH-10-Lapointe	41118	SANJ4-97-2E	3	10	-1	-9	5	3	16	1	3	3	1	2	1	1	1.56983	1	0
Yr-2-1	2	Wet	10	2019-10-03	Site-10 Vero Beach (Barber Bridge)	2019-10-03-CCHH-10-Lapointe	41119	SANJ4-97-3E	3	-2	1	-2	5	5	15	1	2	2	1	3	3	1	0.546028	0	2
Yr-2-1	2	Wet	10	2019-10-03	Site-10 Vero Beach (Barber Bridge)	2019-10-03-CCHH-10-Lapointe	41120	SANJ4-97-5E	3	27	0	5	24	19	20	-3	-1	2	1	10	0	2	1.43332	1	0
Yr-2-2	2	Dry	10	2020-03-16	Site-10 Vero Beach (Barber Bridge)	2020-03-16-CCHH-10-Lapointe	41310	SanJ5-16-1E	4	48	43	33	28	38	-1	-6	0	0	1	1	1	2	1.69919	0.815539	1
Yr-2-2	2	Dry	10	2020-03-16	Site-10 Vero Beach (Barber Bridge)	2020-03-16-CCHH-10-Lapointe	41311	SanJ5-16-2E	4	0	-3	13	4	16	0	13	-4	1.06857	0	2	1	0	2.96145	0.886755	2
Yr-2-2	2	Dry	10	2020-03-16	Site-10 Vero Beach (Barber Bridge)	2020-03-16-CCHH-10-Lapointe	41312	SanJ5-16-3E	4	-1	1	5	1	10	1	49	-4	3.33574	0	1	2	2	0.679677	0.0459459	1
Yr-3-2	3	Dry	10	2021-06-16	Site-10 Vero Beach (Barber Bridge)	2021-06-16-CCHH-10-Lapointe	41950	SANJ5-88-1E	3	4	1	12	20	11	40	0	1	1.49911	0.118308	2.09884	3.86186	3.44578	1.4028	1.19562	0.837869
Yr-3-2	3	Dry	10	2021-06-16	Site-10 Vero Beach (Barber Bridge)	2021-06-16-CCHH-10-Lapointe	41951	SANJ5-88-2E	3	3	0	17	6	11	1	0	-1	0.0825197	0.363581	0.503721	1.51846	2.3911	0.379655	0.0872338	0.714249
Yr-3-2	3	Dry	10	2021-06-16	Site-10 Vero Beach (Barber Bridge)	2021-06-16-CCHH-10-Lapointe	41952	SANJ5-88-3E	3	1	7	2	14	13	4	3	0	1.68707	0.352038	0.926599	2.10249	0.910205	0.253103	1.89862	0.151091
Yr-1-1	1	Wet	11	2018-09-20	Site-11 Sebastian LOBO	2018-09-20-CCHH-11-McFarland	40684	RobJ11-61-1-EtOAC	1	5	-3	6	4	-3	0	-4	-3	1.81577	1.67887	6	3	1	1.93911	1.51047	0
Yr-1-1	1	Wet	11	2018-09-20	Site-11 Sebastian LOBO	2018-09-20-CCHH-11-McFarland	40686	RobJ11-61-2-EtOAC	1	2	-1	3	1	-3	0	-3	2	0.297667	0.234758	2	2	0	5.483	3.98702	1
Yr-1-1	1	Wet	11	2018-09-20	Site-11 Sebastian LOBO	2018-09-20-CCHH-11-McFarland	40688	RobJ11-61-3-EtOAC	1	0	-3	2	-4	-5	0	-5	55	0.416733	0.237129	0	2	3	5.14867	0.730063	3
Yr-1-2	1	Dry	11	2019-03-22	Site-11 Sebastian LOBO	2019-03-22-CCHH-11-McFarland	40824	SANJ5-50-1-EtOAc	2	5	0	5	9	7	0	1	13	1	0.120569	0	3	2	1.69919	0.0844501	4
Yr-1-2	1	Dry	11	2019-03-22	Site-11 Sebastian LOBO	2019-03-22-CCHH-11-McFarland	40825	SANJ5-50-2-EtOAc	2	2	1	2	11	2	-1	-7	0	0	1.45271	1	3	0	0.0970967	5.03452	0
Yr-1-2	1	Dry	11	2019-03-22	Site-11 Sebastian LOBO	2019-03-22-CCHH-11-McFarland	40826	SANJ5-50-3-EtOAc	2	21	1	0	8	7	0	-2	-1	1	1.76148	1	2	5	2.57306	0.695089	1
Yr-2-1	2	Wet	11	2019-10-03	Site-11 Sebastian LOBO	2019-10-03-CCHH-11-Lapointe	41124	RobJ11-98-8E	3	-1	-1	2	12	6	-1	-4	2	2	1	2	3	2	1.36507	0	2
Yr-2-1	2	Wet	11	2019-10-03	Site-11 Sebastian LOBO	2019-10-03-CCHH-11-Lapointe	41134	RobJ11-98-9E	3	26	-1	23	19	15	0	-1	1	4	1	3	3	1	2.04761	1	0
Yr-2-1	2	Wet	11	2019-10-03	Site-11 Sebastian LOBO	2019-10-03-CCHH-11-Lapointe	41135	RobJ11-98-10E	3	25	0	14	24	20	0	-1	5	1	0	1	2	3	3.13966	1	0
Yr-2-1	2	Wet	11	2019-10-03	Site-11 Sebastian LOBO	2019-10-03-CCHH-11-Lapointe	41136	RobJ11-98-11E	3	48	0	29	34	23	0	-4	-1	3	1	2	1	1	1.09206	0	1
Yr-2-2	2	Dry	11	2020-03-16	Site-11 Sebastian LOBO	2020-03-16-CCHH-11-Lapointe	41313	RobJ12-18-7E	4	0	-1	12	22	24	0	-5	-1	0.142206	0	2	2	0	0.485484	3.64351	1
Yr-2-2	2	Dry	11	2020-03-16	Site-11 Sebastian LOBO	2020-03-16-CCHH-11-Lapointe	41314	RobJ12-18-8E	4	-2	-2	14	19	22	0	89	3	0.0325041	1	0	3	1	1.31081	0.912025	1
Yr-2-2	2	Dry	11	2020-03-16	Site-11 Sebastian LOBO	2020-03-16-CCHH-11-Lapointe	41315	RobJ12-18-9E	4	-1	0	2	17	16	0	87	5	3.41293	0	0	0	0	0.534032	0.255	1
Yr-3-1	3	Wet	11	2020-09-30	Site-11 Sebastian LOBO	2020-09-30-CCHH-11-McFarland	41443	SanJ5-47-1E	3	0	-1	1	28	35	3	15	3	2	1	1	2	0	1	0.0712161	2
Yr-3-1	3	Wet	11	2020-09-30	Site-11 Sebastian LOBO	2020-09-30-CCHH-11-McFarland	41444	SanJ5-47-2E	3	10	21	-2	31	27	40	10	81	1	0	0	2	1	1	0.392837	0
Yr-3-1	3	Wet	11	2020-09-30	Site-11 Sebastian LOBO	2020-09-30-CCHH-11-McFarland	41445	SanJ5-47-3E	3	4	16	-4	11	19	27	81	1	0	1	0	2	2	1	0.572026	5
Yr-3-2	3	Dry	11	2021-04-23	Site-11 Sebastian LOBO	2021-04-23-CCHH-11-McFarland	41953	RobJ12-56-4E	3	2	2	1	0	1	22	0	-4	0.472196	3.66841	0.631207	0.219009	1.19194	0.632758	0.102628	0.151091
Yr-3-2	3	Dry	11	2021-04-23	Site-11 Sebastian LOBO	2021-04-23-CCHH-11-McFarland	41954	RobJ12-56-5E	3	3	3	20	21	15	12	0	-2	1.38908	0.960892	0.0684066	2.08788	3.61915	3.22706	1.67284	0.686778
Yr-3-2	3	Dry	11	2021-04-23	Site-11 Sebastian LOBO	2021-04-23-CCHH-11-McFarland	41955	RobJ12-56-6E	3	3	-1	17	59	43	23	-1	-3	0.660158	1.46009	1.13493	0.122141	1	0.569482	2.23729	0.934018
Yr-1-1	1	Wet	12	2018-10-09	Site-12 Turkey Creek	2018-10-09-CCHH-12-McFarland	40690	SANJ4-33-1-EtOAC	1	1	-2	12	-4	-3	5	0	52	1.4288	0.912947	0	2	0	2.7415	0.0472023	3
Yr-1-1	1	Wet	12	2018-10-09	Site-12 Turkey Creek	2018-10-09-CCHH-12-McFarland	40692	SANJ4-33-2-EtOAC	1	4	-2	0	-1	-5	4	-3	30	0.0297667	1.13111	3	4	2	1.20359	1.99509	1.5
Yr-1-1	1	Wet	12	2018-10-09	Site-12 Turkey Creek	2018-10-09-CCHH-12-McFarland	40694	SANJ4-33-3-EtOAC	1	4	-3	-4	58	1	1	0	39	1.39903	0.135164	0	0.5	1	0.0668659	0.415381	3.5
Yr-1-2	1	Dry	12	2019-03-22	Site-12 Turkey Creek	2019-03-22-CCHH-12-McFarland	40827	RobJ11-78-4-EtOAc	2	-1	0	5	-1	3	0	-1	0	2	1.33214	5	1	5	2.13613	1.49087	2
Yr-1-2	1	Dry	12	2019-03-22	Site-12 Turkey Creek	2019-03-22-CCHH-12-McFarland	40828	TANK5-60-4-EtOAc	2	6	0	0	5	5	29	0	2	1	0.367588	10	7	0	1.89339	1.45839	1
Yr-1-2	1	Dry	12	2019-03-22	Site-12 Turkey Creek	2019-03-22-CCHH-12-McFarland	40829	SANJ4-51-1-EtOAc	2	-2	-1	8	4	6	13	-4	1	2	0.0176442	4	2	9	0.29129	1.46813	1
Yr-2-1	2	Wet	12	2019-10-11	Site-12 Turkey Creek	2019-10-11-CCHH-12-Lapointe	41131	SANJ4-98-1E	3	3	6	-1	22	14	8	0	-1	4	2	4	1	1	1.63809	1	0
Yr-2-1	2	Wet	12	2019-10-11	Site-12 Turkey Creek	2019-10-11-CCHH-13-Lapointe	41132	SANJ4-98-2E	3	2	7	-5	3	10	0	1	-2	5	3	7	4	2	0.750789	1	1
Yr-2-1	2	Wet	12	2019-10-11	Site-12 Turkey Creek	2019-10-11-CCHH-12-Lapointe	41133	SANJ4-98-3E	3	-3	-1	5	5	7	0	-2	3	3	0	0	3	1	2.25237	0	3
Yr-2-2	2	Dry	12	2020-03-04	Site-12 Turkey Creek	2020-03-04-CCHH-12-Lapointe	41316	SanJ5-15-1E	4	0	-1	14	13	17	1	82	4	2.19809	3	2	1	2	0.485484	0.663918	2
Yr-2-2	2	Dry	12	2020-03-04	Site-12 Turkey Creek	2020-03-04-CCHH-12-Lapointe	41317	SanJ5-15-2E	4	-2	-4	8	30	22	11	55	1	0.113764	1	1	1	1	2.23322	1.2704	0
Yr-2-2	2	Dry	12	2020-03-04	Site-12 Turkey Creek	2020-03-04-CCHH-12-Lapointe	41318	SanJ5-15-3E	4	2	-3	8	26	15	12	80	0	1.63739	1	2	0	1	1.01952	0.413513	2
Yr-3-2	3	Dry	12	2021-05-03	Site-12 Turkey Creek	2021-05-03-CCHH-12-Lapointe	41956	SANJ5-86-1E	3	12	0	14	4	20	2	0	0	1.37533	1.79482	1.96514	3.59175	4.06703	0.569482	1.62665	1.52465
Yr-3-2	3	Dry	12	2021-05-03	Site-12 Turkey Creek	2021-05-03-CCHH-12-Lapointe	41957	SANJ5-86-2E	3	10	6	21	4	22	2	1	2	1.68707	0.666565	0	1.89078	1.80596	0.759309	2.09874	1.01643
Yr-3-2	3	Dry	12	2021-05-03	Site-12 Turkey Creek	2021-05-03-CCHH-12-Lapointe	41958	SANJ5-86-3E	3	20	4	33	25	0	1	1	3	1.43034	0.735818	1.49251	3.14643	0.888534	1.77172	0.215519	3.40642
Yr-1-1	1	Wet	13	2018-10-09	Site-13 Melbourne (404 Bridge-Pineda Causeway)	2018-10-09-CCHH-13-McFarland	40696	RobJ11-62-1-EtOAC	1	5	-2	1	30	-5	1	-6	58	2.08367	0.597565	5	5	0	3.47703	0.358738	2
Yr-1-1	1	Wet	13	2018-10-09	Site-13 Melbourne (404 Bridge-Pineda Causeway)	2018-10-09-CCHH-13-McFarland	40698	RobJ11-62-2-EtOAC	1	4	-2	4	0	-5	0	-4	-2	3.36363	1.6267	3	4	3	0.401195	1.52936	1
Yr-1-1	1	Wet	13	2018-10-09	Site-13 Melbourne (404 Bridge-Pineda Causeway)	2018-10-09-CCHH-13-McFarland	40700	RobJ11-62-3-EtOAC	1	2	-3	8	-2	-5	0	-5	10	1.48833	0.331981	5	1	1	1.60478	1.66467	8
Yr-1-2	1	Dry	13	2019-03-25	Site-13 Melbourne (404 Bridge-Pineda Causeway)	2019-03-25-CCHH-13-McFarland	40830	RobJ11-79-4-EtOAc	2	-1	0	8	0	30	0	-1	1	0	1.97321	1	1	5	0.0485484	0.470971	1
Yr-1-2	1	Dry	13	2019-03-25	Site-13 Melbourne (404 Bridge-Pineda Causeway)	2019-03-25-CCHH-13-McFarland	40831	SANJ5-52-1-EtOAc	2	0	38	18	1	43	0	-3	-2	2	0.546971	0	1	4	0.436935	0.454731	2
Yr-1-2	1	Dry	13	2019-03-25	Site-13 Melbourne (404 Bridge-Pineda Causeway)	2019-03-25-CCHH-13-McFarland	40832	TANK5-61-4-EtOAc	2	0	34	16	-1	23	0	0	-3	4	2	0	3	6	1.6021	1.48112	1
Yr-2-1	2	Wet	13	2019-10-11	Site-13 Melbourne (404 Bridge-Pineda Causeway)	2019-10-11-CCHH-12-Lapointe	41121	RobJ11-98-5E	3	1	18	11	18	14	0	0	3	2	1	2	3	2	4.23172	0	4
Yr-2-1	2	Wet	13	2019-10-11	Site-13 Melbourne (404 Bridge-Pineda Causeway)	2019-10-11-CCHH-13-Lapointe	41122	RobJ11-98-6E	3	30	51	12	22	25	0	2	3	1	0	4	0	0	0.682536	0	1
Yr-2-1	2	Wet	13	2019-10-11	Site-13 Melbourne (404 Bridge-Pineda Causeway)	2019-10-11-CCHH-13-Lapointe	41123	RobJ11-98-7E	3	34	50	24	27	22	-1	0	1	4	1.41421	3	1	1	1.50158	1	0
Yr-2-2	2	Dry	13	2020-03-04	Site-13 Melbourne (404 Bridge-Pineda Causeway)	2020-03-04-CCHH-13-Lapointe	41319	RobJ12-18-4E	4	0	0	32	43	25	0	81	13	0.426617	3	1	2	2	2.42742	0.431891	0
Yr-2-2	2	Dry	13	2020-03-04	Site-13 Melbourne (404 Bridge-Pineda Causeway)	2020-03-04-CCHH-13-Lapointe	41320	RobJ12-18-5E	4	0	-3	23	38	13	0	8	7	2.9985	0	0	1	1	1.16516	0.360675	0
Yr-2-2	2	Dry	13	2020-03-04	Site-13 Melbourne (404 Bridge-Pineda Causeway)	2020-03-04-CCHH-13-Lapointe	41321	RobJ12-18-6E	4	1	1	12	21	13	-1	35	12	1.53988	0	2	0	1	1.84484	0.620269	1
Yr-3-2	3	Dry	13	2021-05-03	Site-13 Melbourne (404 Bridge-Pineda Causeway)	2021-05-03-CCHH-13-Lapointe	41959	RobJ12-56-7E	3	0	9	1	22	14	19	0	8	0.100857	1.71691	0.898614	0.131405	1.82041	2.91069	0.646556	6.74416
Yr-3-2	3	Dry	13	2021-05-03	Site-13 Melbourne (404 Bridge-Pineda Causeway)	2021-05-03-CCHH-13-Lapointe	41960	RobJ12-56-8E	3	0	1	2	22	3	15	-1	-3	0.366754	0.946464	0.419768	2.4748	1.61814	1.07569	0.826155	1.29114
Yr-3-2	3	Dry	13	2021-05-03	Site-13 Melbourne (404 Bridge-Pineda Causeway)	2021-05-03-CCHH-13-Lapointe	41961	RobJ12-56-9E	3	0	0	1	60	40	11	91	1	0.311741	0.00865668	1.11316	0.238388	3.24351	1.32879	0.309791	3.69487
Yr-4-1	4	Wet	13	2021-09-16	Site-13 Melbourne (404 Bridge-Pineda Causeway)	2021-09-16-CCHH-13-McFarland	42004	SANJ5-97-1	3	-1	1	19	4	-1	0	0	-2	0.202342	1.41207	0.273626	2.75221	1.63259	2.53103	0.102628	0.952974
Yr-4-1	4	Wet	13	2021-09-16	Site-13 Melbourne (404 Bridge-Pineda Causeway)	2021-09-16-CCHH-13-McFarland	42005	SANJ5-97-2	3	0	3	32	5	9	1	11	-3	0.138445	1.23138	0.0528597	1.65717	1.76984	4.55586	3.28923	2.51857
Yr-4-1	4	Wet	13	2021-09-16	Site-13 Melbourne (404 Bridge-Pineda Causeway)	2021-09-16-CCHH-13-McFarland	42006	SANJ5-97-3	3	0	0	24	12	11	0	0	0	0.314163	1.92069	0.30472	1.70097	3.59748	1.51862	0.215519	0.816835
Yr-1-1	1	Wet	14	2018-10-09	Site-14 Banana River	2018-10-09-CCHH-14-McFarland	40702	RobJ11-62-4-EtOAC	1	3	-2	9	1	-3	-1	-5	26	3.89943	0.815724	3	3	1	0.802391	1.70872	0
Yr-1-1	1	Wet	14	2018-10-09	Site-14 Banana River	2018-10-09-CCHH-14-McFarland	40704	RobJ11-62-5-EtOAC	1	2	-3	5	-3	-3	1	-1	27	0.416733	0.308268	3	1	2	1.87224	2.14613	2
Yr-1-1	1	Wet	14	2018-10-09	Site-14 Banana River	2018-10-09-CCHH-14-McFarland	40706	RobJ11-62-6-EtOAC	1	6	0	-2	-1	15	0	-1	70	0.297667	0.82758	5	2	1	1.40418	2.28774	1.5
Yr-1-2	1	Dry	14	2019-03-25	Site-14 Banana River	2019-03-25-CCHH-14-McFarland	40833	RobJ11-79-1-EtOAc	2	0	10	16	3	11	1	13	-1	2	0.12645	3	0	5	0.679677	2.59846	1
Yr-1-2	1	Dry	14	2019-03-25	Site-14 Banana River	2019-03-25-CCHH-14-McFarland	40834	RobJ11-79-2-EtOAc	2	0	9	17	-3	13	0	-2	-1	4	0.311715	5	1	4	0.145645	1.20504	5
Yr-1-2	1	Dry	14	2019-03-25	Site-14 Banana River	2019-03-25-CCHH-14-McFarland	40835	RobJ11-79-3-EtOAc	2	10	15	18	3	9	1	12	-2	2	0.152917	0	3	2	0.58258	0.389769	1
Yr-2-1	2	Wet	14	2019-10-09	Site-14 Banana River	2019-10-09-CCHH-14-Lapointe	41125	TANK6-14-1E	3	-3	-2	-6	10	3	26	0	4	0	0	7	3	1	0.682536	0	1
Yr-2-1	2	Wet	14	2019-10-09	Site-14 Banana River	2019-10-09-CCHH-14-Lapointe	41126	TANK6-14-2E	3	2	3	16	11	17	49	-1	2	6	0	2	2	0	2	0	0
Yr-2-1	2	Wet	14	2019-10-09	Site-14 Banana River	2019-10-09-CCHH-14-Lapointe	41127	TANK6-14-3E	3	5	1	-1	3	0	14	-1	2	2	1	4	1	1	5.59679	1	0
Yr-2-2	2	Dry	14	2020-03-03	Site-14 Banana River	2020-03-03-CCHH-14-Lapointe	41322	SanJ5-14-1E	4	13	-1	13	0	4	17	9	-4	0.735406	2	1	2	1	0.776774	0.50081	1
Yr-2-2	2	Dry	14	2020-03-03	Site-14 Banana River	2020-03-03-CCHH-14-Lapointe	41323	SanJ5-14-2E	4	49	78	80	98	98	-1	25	3	1.84969	2.12132	2.82843	1.41421	1.2057	0.631129	0.951079	2
Yr-2-2	2	Dry	14	2020-03-03	Site-14 Banana River	2020-03-03-CCHH-14-Lapointe	41324	SanJ5-14-3E	4	31	22	31	66	69	0	7	3	1.3733	1	2	2.12132	4.8833	0.485484	0.847701	1
Yr-3-2	3	Dry	14	2021-04-23	Site-14 Banana River	2021-04-23-CCHH-14-Lapointe	41962	RobJ12-56-10E	3	-1	1	0	15	1	1	0	-4	2.08133	0.819499	0.0310939	2.85442	2.78118	1.89827	1.30851	1.20873
Yr-3-2	3	Dry	14	2021-04-23	Site-14 Banana River	2021-04-23-CCHH-14-Lapointe	41963	RobJ12-56-11E	3	2	0	1	33	7	5	-1	3	0.284235	0.352038	1.06652	0.0292012	2.09492	2.27793	1.91401	0.233505
Yr-3-2	3	Dry	14	2021-04-23	Site-14 Banana River	2021-04-23-CCHH-14-Lapointe	41964	RobJ12-56-12E	3	2	4	2	21	8	3	1	1	2.41141	0.577112	1.28418	0.452618	1.44477	1.77172	1.50863	0.590629
Yr-4-1	4	Wet	14	2021-09-16	Site-14 Banana River	2021-09-16-CCHH-14-McFarland	42007	SANJ5-98-1	3	82	60	46	70	65	0	-1	-4	0.755812	0.556912	1.78042	0.516925	0.0716205	1.45534	0.749184	1.90595
Yr-4-1	4	Wet	14	2021-09-16	Site-14 Banana River	2021-09-16-CCHH-14-McFarland	42008	SANJ5-98-2	3	81	62	56	70	65	1	0	-4	0.715269	1.0219	1.80845	2.7247	1.83612	0.885861	1.29824	0
Yr-4-1	4	Wet	14	2021-09-16	Site-14 Banana River	2021-09-16-CCHH-14-McFarland	42009	SANJ5-98-3	3	78	51	29	20	27	0	0	-1	0.947958	1.89862	1.065	3.60635	0.541789	5.88465	3.65869	1.06189
Yr-1-1	1	Wet	15	2018-10-09	Site-15 North Banana River (NASA)	2018-10-09-CCHH-15-McFarland	40708	WRI29-44-2-EtOAC	1	2	1	7	5	-4	-1	-4	1	2.17297	4.40823	3	2	4	3.47703	0.736356	1
Yr-1-1	1	Wet	15	2018-10-09	Site-15 North Banana River (NASA)	2018-10-09-CCHH-15-McFarland	40710	WRI29-44-4-EtOAC	1	8	26	3	-5	12	0	-3	38	1	1.5	2	4	3	0.735525	4.63842	3
Yr-1-1	1	Wet	15	2018-10-09	Site-15 North Banana River (NASA)	2018-10-09-CCHH-15-McFarland	40712	WRI29-44-6-EtOAC	1	2	-2	0	-6	-5	0	-4	53	0.922766	1.36112	0	0	3	0.133732	2.33809	0
Yr-1-2	1	Dry	15	2019-03-25	Site-15 North Banana River (NASA)	2019-03-25-CCHH-15-McFarland	40836	SANJ4-53-1-EtOAc	2	-1	36	7	-3	52	0	-3	1	2	1	3	3	3	0.776774	1.26025	1
Yr-1-2	1	Dry	15	2019-03-25	Site-15 North Banana River (NASA)	2019-03-25-CCHH-15-McFarland	40837	SANJ4-53-2-EtOAc	2	2	29	5	-1	28	1	6	0	1	0.33524	9	5	4	0.194193	1.81892	0
Yr-1-2	1	Dry	15	2019-03-25	Site-15 North Banana River (NASA)	2019-03-25-CCHH-15-McFarland	40838	SANJ4-53-3-EtOAc	2	0	17	3	2	33	0	-1	0	2	6	1	3	0	0.922419	0.922454	2
Yr-2-1	2	Wet	15	2019-10-09	Site-15 North Banana River (NASA)	2019-10-09-CCHH-15-Lapointe	41128	TANK6-15-1E	3	5	3	-4	1	7	0	0	2	3	0	2	1	1	2.18411	1	2
Yr-2-1	2	Wet	15	2019-10-09	Site-15 North Banana River (NASA)	2019-10-09-CCHH-15-Lapointe	41129	TANK6-15-2E	3	-1	-2	-8	2	5	64	-2	3	3	0	4	3	0	3	0	3
Yr-2-1	2	Wet	15	2019-10-09	Site-15 North Banana River (NASA)	2019-10-09-CCHH-15-Lapointe	41130	TANK6-15-3E	3	3	-1	-11	0	-1	63	0	3	3	1	7	1	2	1	0	1
Yr-2-2	2	Dry	15	2020-03-03	Site-15 North Banana River (NASA)	2020-03-03-CCHH-15-Lapointe	41325	RobJ12-18-1E	4	0	-1	29	76	83	6	-8	1	0.861359	2	1	0.707107	3.99315	1	0.418107	1
Yr-2-2	2	Dry	15	2020-03-03	Site-15 North Banana River (NASA)	2020-03-03-CCHH-15-Lapointe	41326	RobJ12-18-2E	4	45	75	60	96	97	7	39	7	4	0	2.12132	0.707107	1.3571	0	0.925809	3
Yr-2-2	2	Dry	15	2020-03-03	Site-15 North Banana River (NASA)	2020-03-03-CCHH-15-Lapointe	41327	RobJ12-18-3E	4	16	66	46	88	87	3	-10	6	1.87305	0.707107	0.707107	4.24264	3.21635	1	0.266486	2
Yr-3-2	3	Dry	15	2021-05-06	Site-15- N Banana River (NASA)	2021-04-23-CCHH-15-Lapointe	41965	RobJ12-56-13E	3	0	10	1	65	59	3	96		2.0034	0.121194	1.44898	0.885276	1.49911	1.20224	0.153264
Yr-3-2	3	Dry	15	2021-05-06	Site-15- N Banana River (NASA)	2021-04-23-CCHH-15-Lapointe	41966	RobJ12-56-14E	3	-1	8	0	31	37	9	0	-2	1.98047	0.966663	0.286064	1.96378	0.267283	1.51862	2.70938	0.274711
Yr-3-2	3	Dry	15	2021-05-06	Site-15- N Banana River (NASA)	2021-04-23-CCHH-15-Lapointe	41967	RobJ12-56-15E	3	0	14	1	60	56	8	93	12	0.0687664	0.450148	1.9527	1.57919	0.383123	3.66999	1.17329	1.64827
Yr-4-1	4	Wet	15	2021-09-16	Site-15 North Banana River (NASA)	2021-09-16-CCHH-15-McFarland	42010	SANJ6-1-1	3	80	68	58	69	65	2	0	-4	1.64535	1.75716	0.53742	3.51815	1.77611	2.27793	0.944177	0.0136139
Yr-4-1	4	Wet	15	2021-09-16	Site-15 North Banana River (NASA)	2021-09-16-CCHH-15-McFarland	42011	SANJ6-1-2	3	80	66	54	70	69	1	0	-4	2.25338	1.14518	1.27895	3.27924	0.687747	7.40327	2.33479	0.952974
Yr-4-1	4	Wet	15	2021-09-16	Site-15 North Banana River (NASA)	2021-09-16-CCHH-15-McFarland	42012	SANJ6-1-3	3	80	71	49	68	55	2	0	13	0.177442	0.49529	2.75751	4.44448	2.4094	3.66999	3.30462	1.25248
Yr-1-1	1	Wet	16	2018-10-09	Site-16 Cocoa (Magnolia Point)	2018-10-09-CCHH-16-McFarland	40714	TANK5-42-1-EtOAC	1	1	-6	2	-4	-1	0	0	31	1.10137	0.00237129	7	4	3	2.00598	2.36641	2
Yr-1-1	1	Wet	16	2018-10-09	Site-16 Cocoa (Magnolia Point)	2018-10-09-CCHH-16-McFarland	40716	TANK5-42-2-EtOAC	1	3	-2	1	-3	1	1	0	48	0.7144	0.384149	1	4	3	3.81136	2.92655	1
Yr-1-1	1	Wet	16	2018-10-09	Site-16 Cocoa (Magnolia Point)	2018-10-09-CCHH-16-McFarland	40718	TANK5-42-3-EtOAC	1	3	3	3	2	-7	3	18	109	1.36927	0.711387	0	1	1	1.00299	1.96676	21
Yr-1-2	1	Dry	16	2019-03-25	Site-16 Cocoa (Magnolia Point)	2019-03-25-CCHH-16-McFarland	40839	TANK5-61-1-EtOAc	2	4	10	0	0	-1	0	0	0	0	0.241138	7	2	1	1.16516	1.4389	2
Yr-1-2	1	Dry	16	2019-03-25	Site-16 Cocoa (Magnolia Point)	2019-03-25-CCHH-16-McFarland	40840	TANK5-61-2-EtOAc	2	10	6	1	3	0	0	1	1	0	0.0117628	1	6	7	1.6021	0.285831	1
Yr-1-2	1	Dry	16	2019-03-25	Site-16 Cocoa (Magnolia Point)	2019-03-25-CCHH-16-McFarland	40841	TANK5-61-3-EtOAc	2	21	16	6	5	2	8	1	1	0	0.62637	3	3	3	3.15564	0.240358	1
Yr-2-1	2	Wet	16	2019-10-30	Site-16 Cocoa (Magnolia Point)	2019-10-30-CCHH-16-McFarland	41283	SanJ5-3-1E	4	-2	1	34	45	29	0	29	11	1.57239	1	1	3	2	1.65064	0.783377	1
Yr-2-1	2	Wet	16	2019-10-30	Site-16 Cocoa (Magnolia Point)	2019-10-30-CCHH-16-McFarland	41284	SanJ5-3-2E	4	8	1	36	42	24	0	37	5	0.0812603	1	3	2	2	0.970967	0.748918	6
Yr-2-1	2	Wet	16	2019-10-30	Site-16 Cocoa (Magnolia Point)	2019-10-30-CCHH-16-McFarland	41285	SanJ5-3-3E	4	-2	-2	32	50	48	1	63	-2	2.20215	0	1	1.41421	3.83613	2.13613	0.990133	2
Yr-3-1	3	Wet	16	2020-08-12	Site-16 Cocoa (Magnolia Point)	2020-08-12-CCHH-16-McFarland	41328	RobJ12-34-1E	2	16	12	31	2	2	11	-10	6	1.02388	1	1	1	2	2	0.58581	2
Yr-3-1	3	Wet	16	2020-08-12	Site-16 Cocoa (Magnolia Point)	2020-08-12-CCHH-16-McFarland	41329	RobJ12-34-2E	2	21	20	30	20	18	10	32	6	0.816666	0	0	1	2	3	0.854593	0
Yr-3-1	3	Wet	16	2020-08-12	Site-16 Cocoa (Magnolia Point)	2020-08-12-CCHH-16-McFarland	41330	RobJ12-34-3E	2	8	-2	20	25	22	2	7	1	1.05638	2	1	0	0	1	0.845404	2
Yr-3-2	3	Dry	16	2021-04-23	Site-16 Cocoa (Magnolia Point)	2021-04-23-CCHH-16-Lapointe	41968	RobJ12-56-16E	3	7	10	0	3	2	9	1	-1	1.50369	0.0490545	0.50994	4.05166	3.61193	1.32879	3.11989	1.52465
Yr-3-2	3	Dry	16	2021-04-23	Site-16 Cocoa (Magnolia Point)	2021-04-23-CCHH-16-Lapointe	41969	RobJ12-56-17E	3	10	1	2	1	6	1	0	-1	1.75584	1.29562	0.133704	0.591324	1.36531	5.50499	0.559322	2.67843
Yr-3-2	3	Dry	16	2021-04-23	Site-16 Cocoa (Magnolia Point)	2021-04-23-CCHH-16-Lapointe	41970	RobJ12-56-18E	3	19	2	1	4	1	3	-1	0	0.990236	1.84676	0.233204	3.94216	1.76984	4.30275	1.59587	0.796663
Yr-4-1	4	Wet	16	2021-09-16	Site-16 Cocoa (Magnolia Point)	2021-09-16-CCHH-16-McFarland	42013	SANJ6-2-1	3	10	3	35	2	-1	21	-3	-2	0.26624	2.69699	1.26241	5.43872	0.0361193	1.58189	1.63178	0.653468
Yr-4-1	4	Wet	16	2021-09-16	Site-16 Cocoa (Magnolia Point)	2021-09-16-CCHH-16-McFarland	42014	SANJ6-2-2	3	21	1	32	3	6	15	0	1	5.83598	1.25146	1.58268	1.97108	2.80285	3.03724	0.379724	0.408417
Yr-4-1	4	Wet	16	2021-09-16	Site-16 Cocoa (Magnolia Point)	2021-09-16-CCHH-16-McFarland	42015	SANJ6-2-3	3	26	10	30	2	12	12	1	-3	0.287539	1.67307	0.51305	5.92784	2.97623	3.16379	0.0564454	0.299506
Yr-1-1	1	Wet	17	2018-10-24	Site-17 Northern IRL (By Banana River)	2018-10-24-CCHH-17-McFarland	40720	SANJ4-34-1-EtOAC	1	4	7	2	3	-5	-1	-4	17	1.90507	1.41566	2	0	2	0.0668659	3.43004	5
Yr-1-1	1	Wet	17	2018-10-24	Site-17 Northern IRL (By Banana River)	2018-10-24-CCHH-17-McFarland	40722	SANJ4-34-2-EtOAC	1	2	-3	2	-5	-7	1	-4	60	2.7683	0.979343	2	2	2	3.47703	1.12342	2
Yr-1-1	1	Wet	17	2018-10-24	Site-17 Northern IRL (By Banana River)	2018-10-24-CCHH-17-McFarland	40724	SANJ4-34-3-EtOAC	1	5	0	4	-3	-4	-1	9	28	2.679	2.73647	5	1	3	2.67464	2.28774	4
Yr-1-2	1	Dry	17	2019-03-29	Site-17 Northern IRL (By Banana River)	2019-03-29-CCHH-17-McFarland	40842	RobJ11-80-1-EtOAc	2	2	3	9	24	1	30	-1	-2	1	1.43212	3	1	3	2.96145	1.29274	0
Yr-1-2	1	Dry	17	2019-03-29	Site-17 Northern IRL (By Banana River)	2019-03-29-CCHH-17-McFarland	40843	RobJ11-80-2-EtOAc	2	4	10	6	24	4	15	-1	0	1	1.06748	1	2	1	3.05855	0.730818	1
Yr-1-2	1	Dry	17	2019-03-29	Site-17 Northern IRL (By Banana River)	2019-03-29-CCHH-17-McFarland	40844	RobJ11-80-3-EtOAc	2	-1	-1	3	21	3	3	-2	1	1	0.702828	0	3	2	3.34984	0.204629	3
Yr-2-1	2	Wet	17	2019-10-30	Site-17 Northern IRL (By Banana River)	2019-10-30-CCHH-17-McFarland	41286	SanJ5-4-1E	4	0	-2	32	64	67	8	90	8	1.20265	1	3	3.53553	2.30318	0.388387	1.49554	0
Yr-2-1	2	Wet	17	2019-10-30	Site-17 Northern IRL (By Banana River)	2019-10-30-CCHH-17-McFarland	41287	SanJ5-4-2E	4	0	-1	35	47	51	1	88	20	1.62927	1	0	1.41421	0.00482532	0.194193	0.241216	1
Yr-2-1	2	Wet	17	2019-10-30	Site-17 Northern IRL (By Banana River)	2019-10-30-CCHH-17-McFarland	41288	SanJ5-4-3E	4	10	-3	29	16	14	-1	89	3	0.98325	0	0	1	1	1.79629	0.0643242	4
Yr-3-1	3	Wet	17	2020-08-12	Site-17 Northern IRL (By Banana River)	2020-08-12-CCHH-17-McFarland	41331	RobJ12-34-4E	2	13	6	35	26	12	0	-6	1	1.34079	2	3	1	3	1	0.35608	4
Yr-3-1	3	Wet	17	2020-08-12	Site-17 Northern IRL (By Banana River)	2020-08-12-CCHH-17-McFarland	41332	RobJ12-34-5E	2	34	52	40	53	42	50	87	14	1.10108	2.12132	1	2.82843	0	0	0.0137838	3
Yr-3-1	3	Wet	17	2020-08-12	Site-17 Northern IRL (By Banana River)	2020-08-12-CCHH-17-McFarland	41333	RobJ12-34-6E	2	-1	8	38	-2	13	0	-7	4	2.56376	1	2	4	1	1	0.163108	1
Yr-3-1	3	Wet	17.5	2020-08-12	Site 17.5- NIRL Pyrodinium	2020-08-12-CCHH-17.5-McFarland	41334	RobJ12-34-7E	2	-1	0	35	-2	8	3	-8	1	3.5592	2	0	2	2	1	0.0689188	4
Yr-3-1	3	Wet	17.5	2020-08-12	Site 17.5- NIRL Pyrodinium	2020-08-12-CCHH-17.5-McFarland	41335	RobJ12-34-8E	2	30	-1	39	4	10	6	60	0	1.89743	1	0	2	1	3	0.735134	0
Yr-3-1	3	Wet	17.5	2020-08-12	Site 17.5- NIRL Pyrodinium	2020-08-12-CCHH-17.5-McFarland	41336	RobJ12-34-9E	2	-3	-3	18	3	11	2	-7	-1	0.975124	0	1	4	1	0	0.859188	2
Yr-1-1	1	Wet	18	2018-10-24	Site-18 Turnbull Basin	2018-10-24-CCHH-18-McFarland	40726	RobJ11-64-1-EtOAC	1	1	-2	8	-6	-5	-1	-2	51	1.30973	2.04879	0	1	2	2.40717	3.41745	5
Yr-1-1	1	Wet	18	2018-10-24	Site-18 Turnbull Basin	2018-10-24-CCHH-18-McFarland	40728	RobJ11-64-2-EtOAC	1	3	-2	7	-6	-4	0	1	25	4.49476	1.82826	3	4	1	2.47404	1.89439	8
Yr-1-1	1	Wet	18	2018-10-24	Site-18 Turnbull Basin	2018-10-24-CCHH-18-McFarland	40730	RobJ11-64-3-EtOAC	1	4	1	2	1	2	0	1	43	3.6613	0.673446	7	1	1	3.27643	0.579015	2
Yr-1-2	1	Dry	18	2019-03-29	Site-18 Turnbull Basin	2019-03-29-CCHH-18-McFarland	40845	RobJ11-80-4-EtOAc	2	-1	2	3	0	28	0	-3	0	0	1.32038	2	2	2	1.45645	1.19854	2
Yr-1-2	1	Dry	18	2019-03-29	Site-18 Turnbull Basin	2019-03-29-CCHH-18-McFarland	40846	RobJ11-80-5-EtOAc	2	0	5	3	-4	24	-1	-3	2	1	0.12645	2	5	8	0.145645	0.0747058	2
Yr-1-2	1	Dry	18	2019-03-29	Site-18 Turnbull Basin	2019-03-29-CCHH-18-McFarland	40847	RobJ11-80-6-EtOAc	2	1	11	-1	4	27	0	-1	1	1	0.396995	3	0	0	3.25274	1.83192	3
Yr-2-1	2	Wet	18	2019-10-30	Site-18 Turnbull Basin	2019-10-30-CCHH-18-McFarland	41289	RobJ12-8-1E	4	-1	-2	22	3	6	0	-6	11	1.31235	1	1	1	1	2.71871	0.709864	2
Yr-2-1	2	Wet	18	2019-10-30	Site-18 Turnbull Basin	2019-10-30-CCHH-18-McFarland	41290	RobJ12-8-2E	4	-1	-1	18	2	9	-1	-5	8	2.14121	0	1	1	1	0.970967	0.197567	3
Yr-2-1	2	Wet	18	2019-10-30	Site-18 Turnbull Basin	2019-10-30-CCHH-18-McFarland	41291	RobJ12-8-3E	4	-3	0	16	24	18	-1	7	2	0.109701	1	2	1	2	1.65064	0.282567	1
Yr-3-1	3	Wet	18	2020-08-12	Site-18 Turnbull Basin	2020-08-12-CCHH-18-McFarland	41337	RobJ12-34-10E	2	81	49	38	49	55	7	43	11	2.67308	1	2	1	0.734398	3	0.52608	1
Yr-3-1	3	Wet	18	2020-08-12	Site-18 Turnbull Basin	2020-08-12-CCHH-18-McFarland	41338	RobJ12-34-11E	2	-2	15	32	13	12	2	-11	1	1.7024	1	2	1	1	0	0.206756	1
Yr-3-1	3	Wet	18	2020-08-12	Site-18 Turnbull Basin	2020-08-12-CCHH-18-McFarland	41339	RobJ12-34-12E	2	33	37	29	7	13	41	88	14	0.495688	2	2	0	0	0	0.67081	1
Yr-1-1	1	Wet	19	2018-10-24	Site-19 Southern Mosquito Lagoon	2018-10-24-CCHH-19-McFarland	40732	TANK5-43-1-EtOAC	1	6	-3	3	29	-6	0	-4	-1	2.08367	0.308268	6	1	1	0.0668659	0.0314682	1
Yr-1-1	1	Wet	19	2018-10-24	Site-19 Southern Mosquito Lagoon	2018-10-24-CCHH-19-McFarland	40734	TANK5-43-2-EtOAC	1	4	-2	8	74	-2	0	-5	4	0.238133	1.6599	1	2	6	1.73851	0.320976	6
Yr-1-1	1	Wet	19	2018-10-24	Site-19 Southern Mosquito Lagoon	2018-10-24-CCHH-19-McFarland	40736	TANK5-43-3-EtOAC	1	3	-2	8	-2	-2	1	-2	9	4.16733	0.36755	0	3	0	5.34927	0.122726	4
Yr-1-2	1	Dry	19	2019-03-29	Site-19 Southern Mosquito Lagoon	2019-03-29-CCHH-19-McFarland	40848	SANJ4-54-1-EtOAc	2	1	12	2	-2	0	0	-3	0	1	1.06159	11	4	2	2.86435	0.795779	2
Yr-1-2	1	Dry	19	2019-03-29	Site-19 Southern Mosquito Lagoon	2019-03-29-CCHH-19-McFarland	40849	SANJ4-54-2-EtOAc	2	-1	18	6	1	-1	5	3	1	2	0.0999839	7	1	5	0.388387	0	2
Yr-1-2	1	Dry	19	2019-03-29	Site-19 Southern Mosquito Lagoon	2019-03-29-CCHH-19-McFarland	40850	SANJ4-54-3-EtOAc	2	1	11	0	-4	6	0	-1	1	1	0.479335	5	5	6	2.57306	0.665856	2
Yr-2-1	2	Wet	19	2019-10-30	Site-19 Southern Mosquito Lagoon	2019-10-30-CCHH-19-McFarland	41292	RobJ12-8-4E	4	30	35	45	43	51	55	90	-4	1.83242	2	1.41421	0	1.35686	1	0.974052	2
Yr-2-1	2	Wet	19	2019-10-30	Site-19 Southern Mosquito Lagoon	2019-10-30-CCHH-19-McFarland	41293	RobJ12-8-5E	4	12	19	34	38	44	44	81	0	0.763847	0	0	1	1	1	0.473242	0
Yr-2-1	2	Wet	19	2019-10-30	Site-19 Southern Mosquito Lagoon	2019-10-30-CCHH-19-McFarland	41294	RobJ12-8-6E	4	22	-1	30	38	37	21	90	126	1.06857	0	0	0	1	1.69919	0.861485	4
Yr-3-1	3	Wet	19	2020-08-12	Site-19 Southern Mosquito Lagoon	2020-08-12-CCHH-19-McFarland	41340	RobJ12-34-13E	2	85	50	36	33	35	2	-6	5	0.735649	0.707107	2	0	1	0	2.69013	1
Yr-3-1	3	Wet	19	2020-08-12	Site-19 Southern Mosquito Lagoon	2020-08-12-CCHH-19-McFarland	41341	RobJ12-34-14E	2	71	43	34	18	21	13	89	13	0.865503	1.41421	1	2	1	0	1.44729	5
Yr-3-1	3	Wet	19	2020-08-12	Site-19 Southern Mosquito Lagoon	2020-08-12-CCHH-19-McFarland	41342	RobJ12-34-15E	2	84	73	56	30	50	-2	7	-4	3.6716	1	0.707107	4	3	1	0.124054	1
Yr-1-1	1	Wet	20	2018-10-24	Site-20 Northern Mosquito Lagoon	2018-10-24-CCHH-20-McFarland	40738	RobJ11-64-4-EtOAC	1	3	-2	5	-3	-1	0	-2	29	0.4465	0.723243	2	4	2	0.534927	1.81257	3
Yr-1-1	1	Wet	20	2018-10-24	Site-20 Northern Mosquito Lagoon	2018-10-24-CCHH-20-McFarland	40740	RobJ11-64-5-EtOAC	1	2	18	6	1	-2	0	-1	20	2	2	4	1	1	2.13971	2.57095	1
Yr-1-1	1	Wet	20	2018-10-24	Site-20 Northern Mosquito Lagoon	2018-10-24-CCHH-20-McFarland	40742	RobJ11-64-6-EtOAC	1	4	0	2	-6	2	0	1	64	0.0297667	0.320124	2	3	1	0.869257	2.62445	0.5
Yr-1-2	1	Dry	20	2019-03-29	Site-20 Northern Mosquito Lagoon	2019-03-29-CCHH-20-McFarland	40851	SANJ4-55-1-EtOAc	2	0	10	0	0	2	0	7	1	1	1.55563	5	5	1	2.86435	0.773043	1
Yr-1-2	1	Dry	20	2019-03-29	Site-20 Northern Mosquito Lagoon	2019-03-29-CCHH-20-McFarland	40852	SANJ4-55-2-EtOAc	2	0	10	0	2	4	0	-1	0	0	1.28509	9	1	2	2.76726	0.155908	3
Yr-1-2	1	Dry	20	2019-03-29	Site-20 Northern Mosquito Lagoon	2019-03-29-CCHH-20-McFarland	40853	SANJ4-55-3-EtOAc	2	3	11	0	3	11	1	25	1	2	1.06159	0	3	1	3.20419	1	0
Yr-2-1	2	Wet	21	2019-08-09	Site-21 Northern IRL Pyrodiniun		41103	RobJ11-88-1E	2	91	50	66	77	85	13	-1	1	0	0.707107	0.707107	4.24264	0.463547	0.136507	0	1
Yr-2-1	2	Wet	21	2019-08-09	Site-21 Northern IRL Pyrodiniun		41104	RobJ11-88-2E	2	90	50	68	80	84	16	-2	4	0.707107	0.707107	0.707107	0.707107	0.0513382	2.18411	0	1
Yr-2-1	2	Wet	21	2019-08-09	Site-21 Northern IRL Pyrodiniun		41105	RobJ11-88-3E	2	94	52	56	83	90	16	-1	4	0.707107	0.707107	0.707107	4.24264	0.430323	0.477775	0	1
Yr-2-1	2	Wet	22	2019-08-09	Site-22 Northern IRL Pyrodiniun		41106	RobJ11-88-4E	2	96	62	62	86	86	17	-1	6	0.707107	2.12132	1.41421	0.707107	1.21171	1.16031	1	4
Yr-2-1	2	Wet	22	2019-08-09	Site-22 Northern IRL Pyrodiniun		41107	RobJ11-88-5E	2	98	58	42	80	85	16	-3	8	0.707107	2.12132	0.707107	2.12132	1.20665	0.0887296	0	4
Yr-2-1	2	Wet	22	2019-08-09	Site-22 Northern IRL Pyrodiniun		41108	RobJ11-88-6E	2	91	57	55	80	84	15	1	7	1.41421	2.82843	0	2.82843	2.41693	0.204761	0	2
Yr-2-1	2	Wet	23	2019-08-21	Site 23 Harbor Town Bloom	2019-08-21-CCHH-24-McFarland	41109	RobJ11-92-1E	2	72	68	55	88	96	48	20	56	2.12132	2.12132	1.41421	0.707107	0.278365	0	1.41421	0
Yr-2-1	2	Wet	23	2019-08-21	Site 23 Harbor Town Bloom	2019-08-21-CCHH-24-McFarland	41110	RobJ11-92-2E	2	96	98	54	90	94	45	21	74	0.707107	0	0.707107	0.707107	2.8077	0	1.41421	7.77817
Yr-2-1	2	Wet	23	2019-08-21	Site 23 Harbor Town Bloom	2019-08-21-CCHH-24-McFarland	41111	RobJ11-92-3E	2	60	88	51	92	93	61	1	82	2.12132	1.41421	1.41421	0.707107	1.70761	1	0	4.24264
