# Supplementary figures and images for: An Assessment of Potential Threats to Human Health from Algae Blooms in the Indian River Lagoon (USA) 2018–2021: Unique Patterns of Cytotoxicity Associated with Toxins
Source: MDPI journal article supplement (doi:10.3390/toxins15110664), 2023-11-17

**Figure S1.** Statistical analysis of the data by season per year.

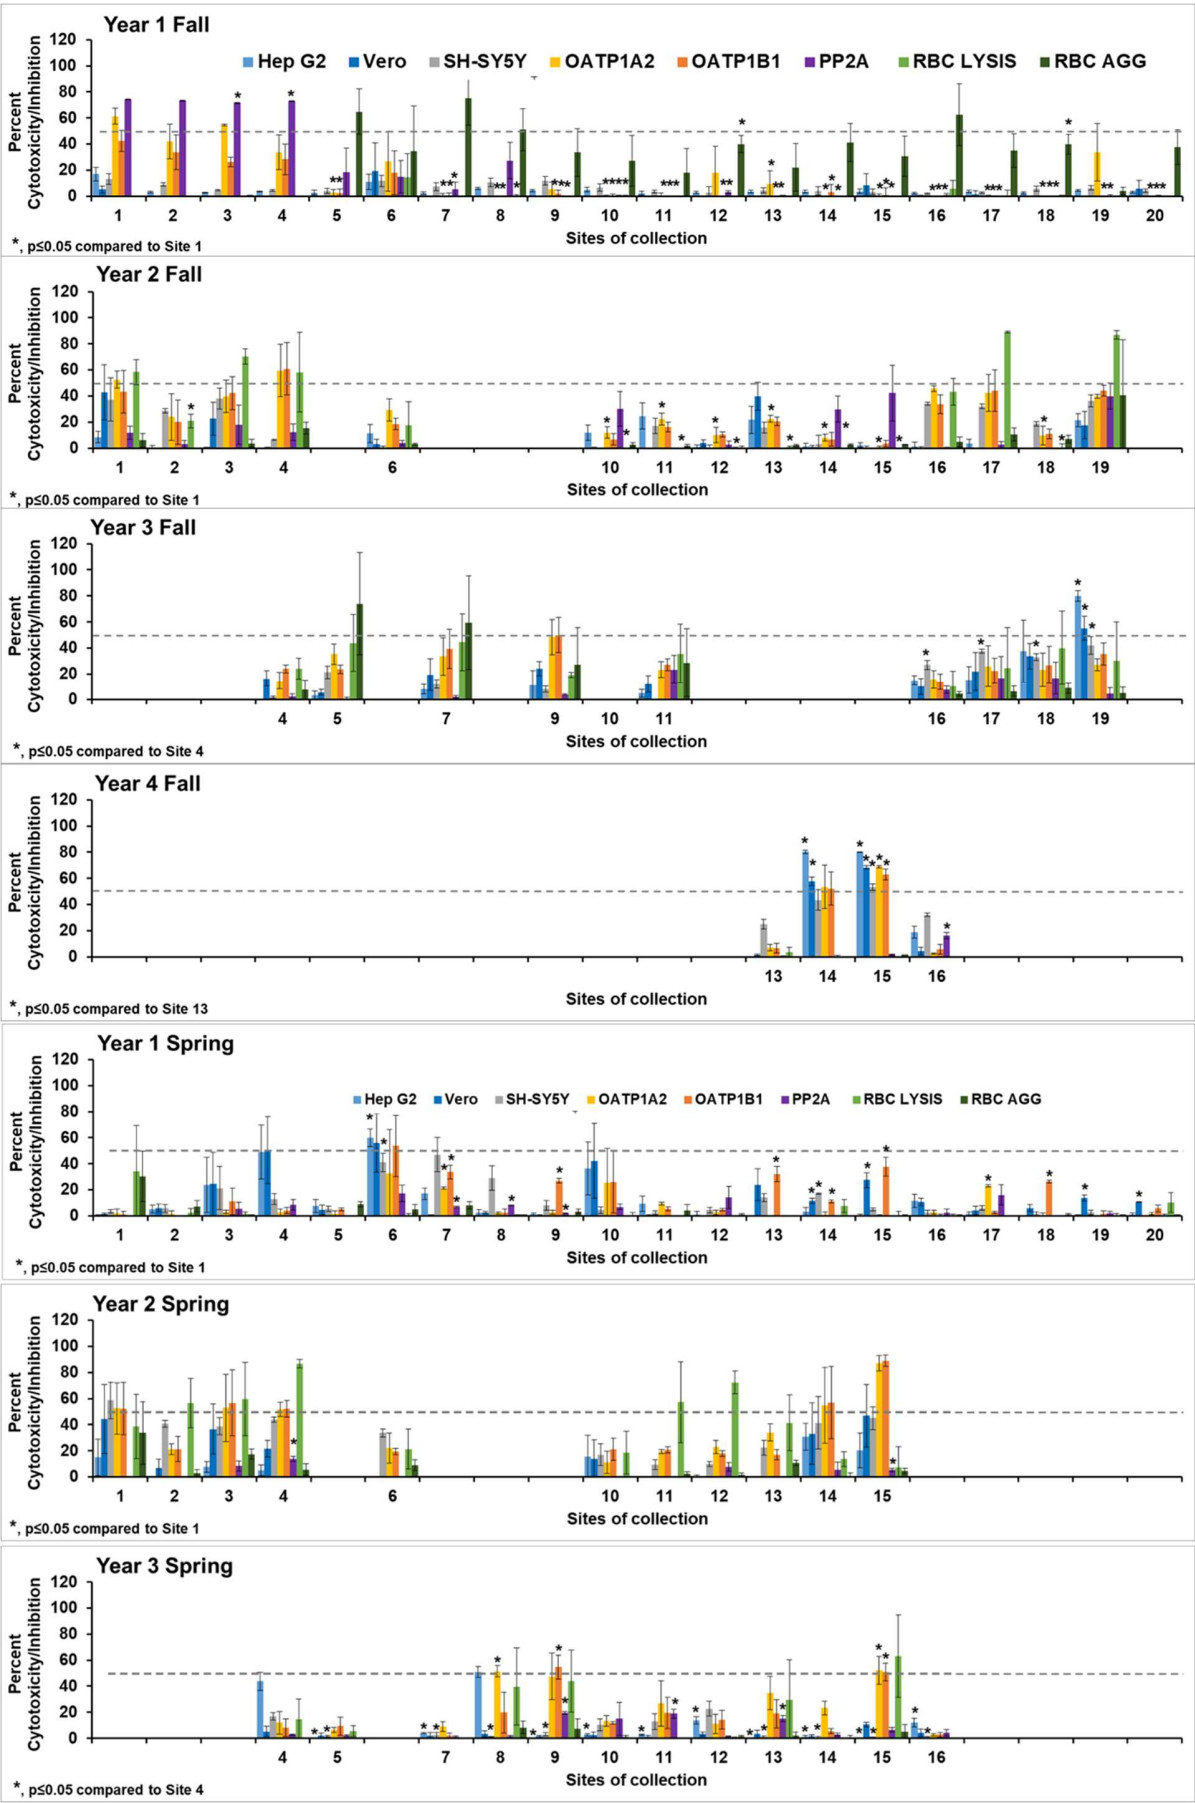

Supplement: s1 [file s1]
